# Supplementary material
Source: PubMed Central journal article supplement (PMC3950328)
Supplement: cdd2013199x1.pdf [file cdd2013199x1.pdf]

## Supplementary Figure Legends

### Supplementary Figure 1. Additional data for main Figures 1 and 2

(A)  $\Delta$ Np63 $\alpha$  is the predominant p63 isoform in the adult mammary gland. Immunoblot analysis with pan-p63 4A4 antibody of a representative virgin gland (*lane 1*), along with protein lysates of Phoenix E cells transfected with indicated p63 isoforms (*lanes 2, 3, 5-9*) as positive controls. Protein lysate from p63<sup>-/-</sup> mouse embryo fibroblasts (MEF, *lane 4*) served as a negative control. Arrowhead,  $\Delta$ Np63 $\alpha$ . Asterisks, non-specific bands. (B-E) p63 deficiency has no effect on the architecture of virgin, lactating and completely involuted (restructured) mammary glands. (B) Representative images of whole-mount carmine staining (*top*) and H&E staining (*bottom*) of p63<sup>+/+</sup> and p63<sup>+/-</sup> mammary glands from 6 wks old virgin females. (C-E) H&E staining of p63<sup>+/+</sup> and p63<sup>+/-</sup> mammary glands at the indicated stages.

### Supplementary Figure 2. Additional data for main Figure 3

(A) Immunoblot analysis of p21, a p53 target gene, in whole WT and matching p63<sup>+/-</sup> mammary glands at 3 days post involution. L10, lactation day 10. p21 antibody was from BD Biosciences (Cat. No 556431). (B) Immunoblot analysis of p53 and MAPK (loading control) in WT and p63<sup>+/-</sup> mammary glands at indicated stages and in p63-null mouse embryo fibroblasts (p63<sup>-/-</sup> MEFs). For each stage, one out of two independent experiments is shown, both with similar results. Compl. inv., complete involution.

### Supplementary Figure 3. Additional data for main Figure 4B and for Materials and methods

(A) Gating on mammary epithelial cells prior to PI/CD24 FACS analysis shown in Figure 4B. FACS gating focused on all live cells (*left*), followed by exclusion of endothelial (CD31<sup>positive</sup>) and hematopoietic (CD45<sup>positive</sup>/Ter119<sup>positive</sup>) cells (*right*). (B) Breeding diagram to generate p63;Rosa<sup>LSL-LacZ/+</sup>;WAP-Cre animals. See Materials and Methods for details.

### Supplementary Figure 4. Transcriptional regulation of apoptosis-related genes by $\Delta$ Np63 in mammary cells

Published microarray data from human non-transformed MCF10A breast epithelial cells (Carroll et al., 2006) were re-analyzed for possible regulation of apoptosis-related genes by  $\Delta$ Np63. shRNA against the p63 DNA-binding domain (DBD) was used to knock down all p63 isoforms (*top*), whereas shRNA against the p63 TA domain was TAp63-specific (*bottom*). Note that only DBD (but not TA) shRNA shows preferential and strong activation of a pro-apoptotic program, suggesting that  $\Delta$ Np63, but not TAp63, is a direct transcriptional repressor of the apoptotic program in the mammary gland. Only genes represented at least twice on the microarray were considered. Solid bars represent significant changes (>1.25 fold).

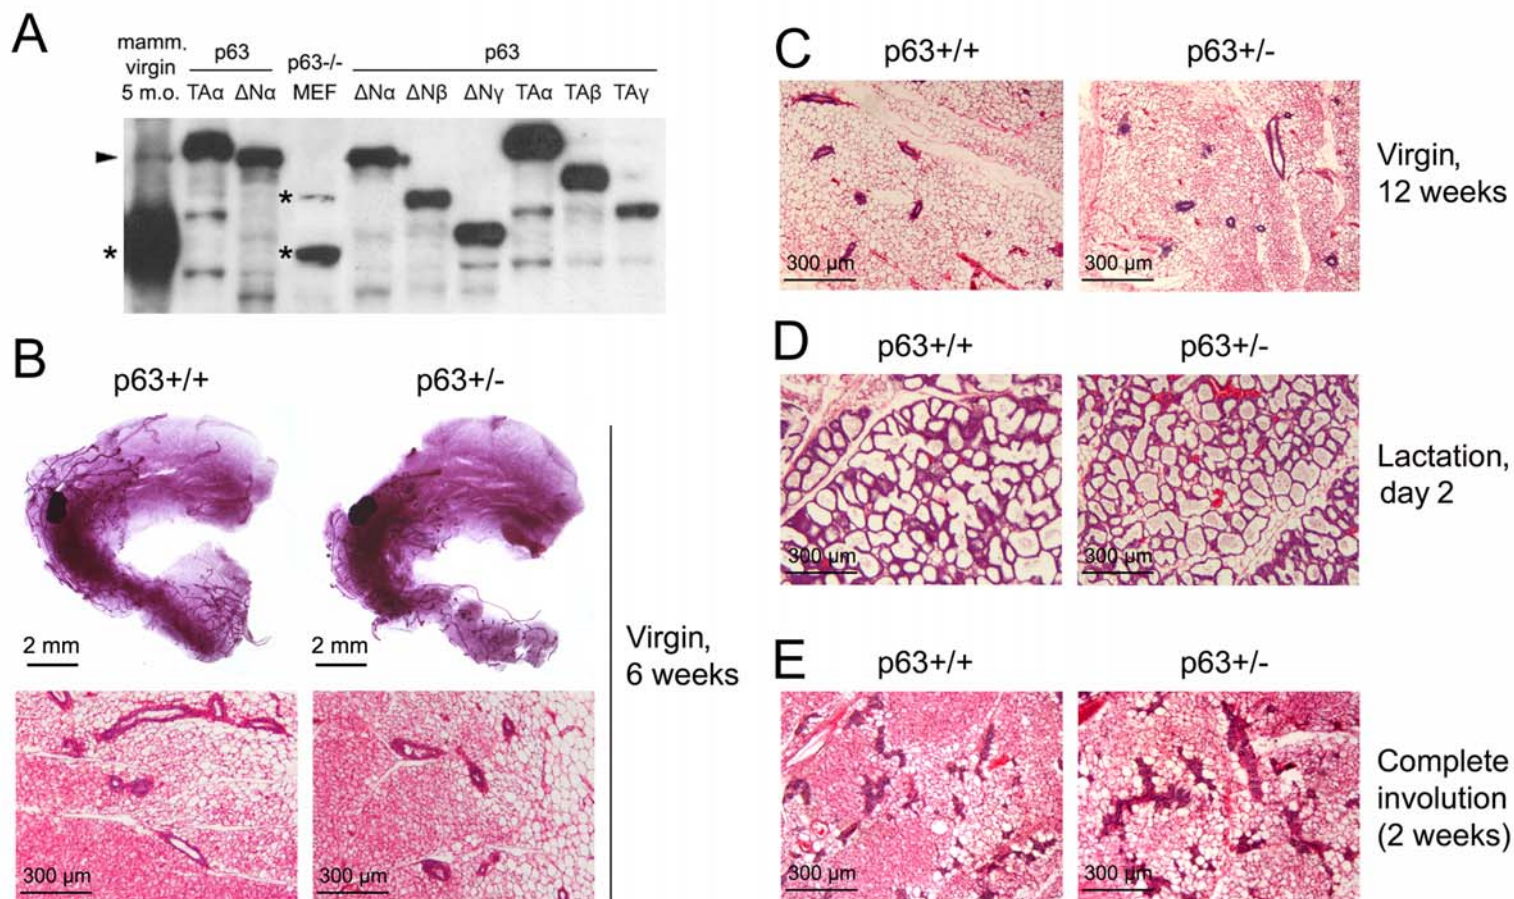

Supplementary Figure 1

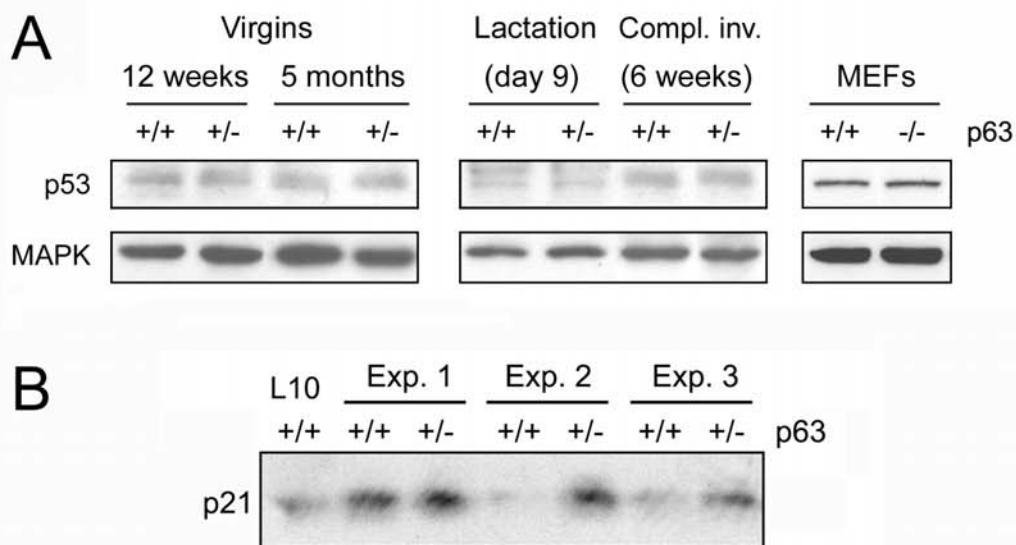

Supplementary Figure 2

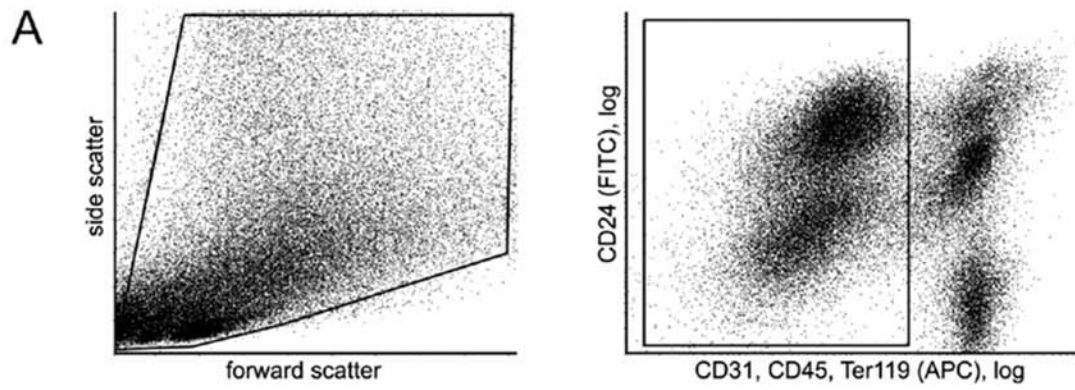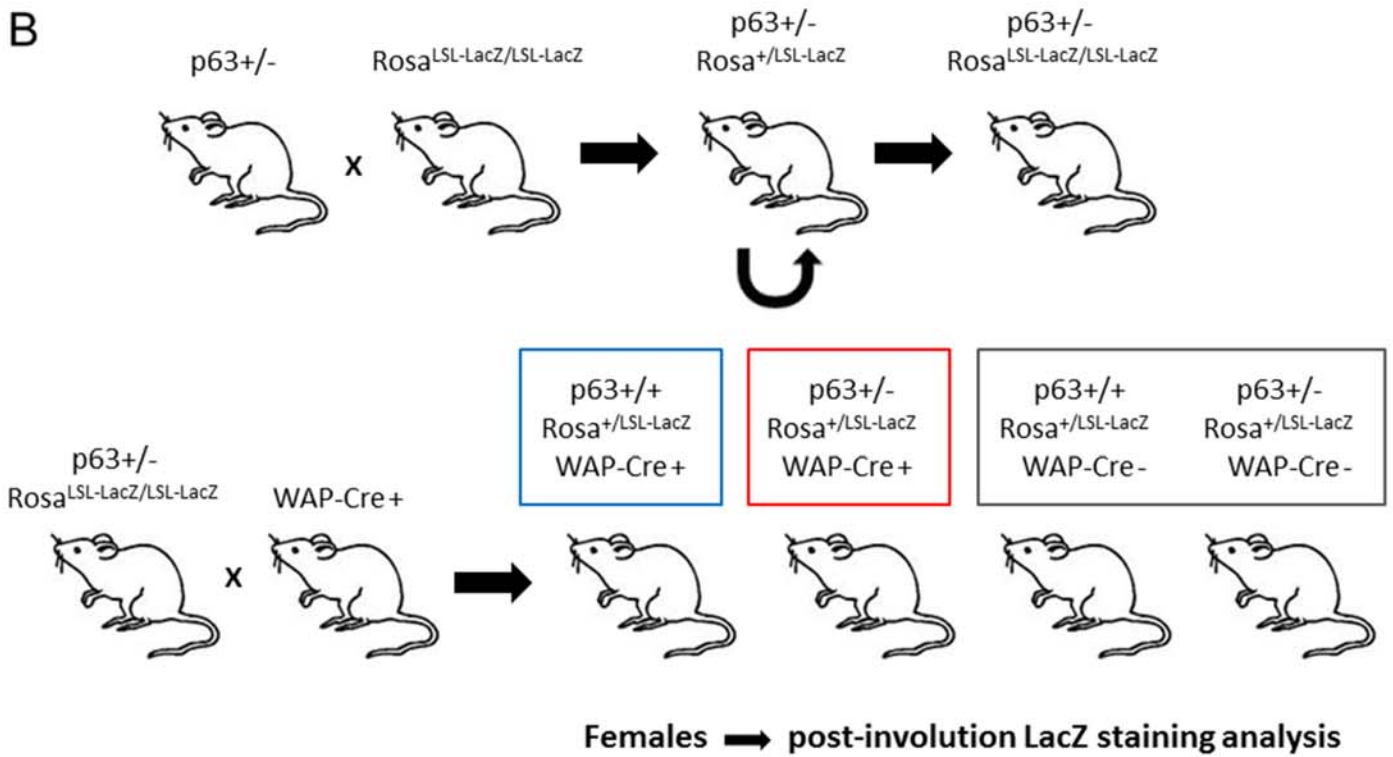

Supplementary Figure 3

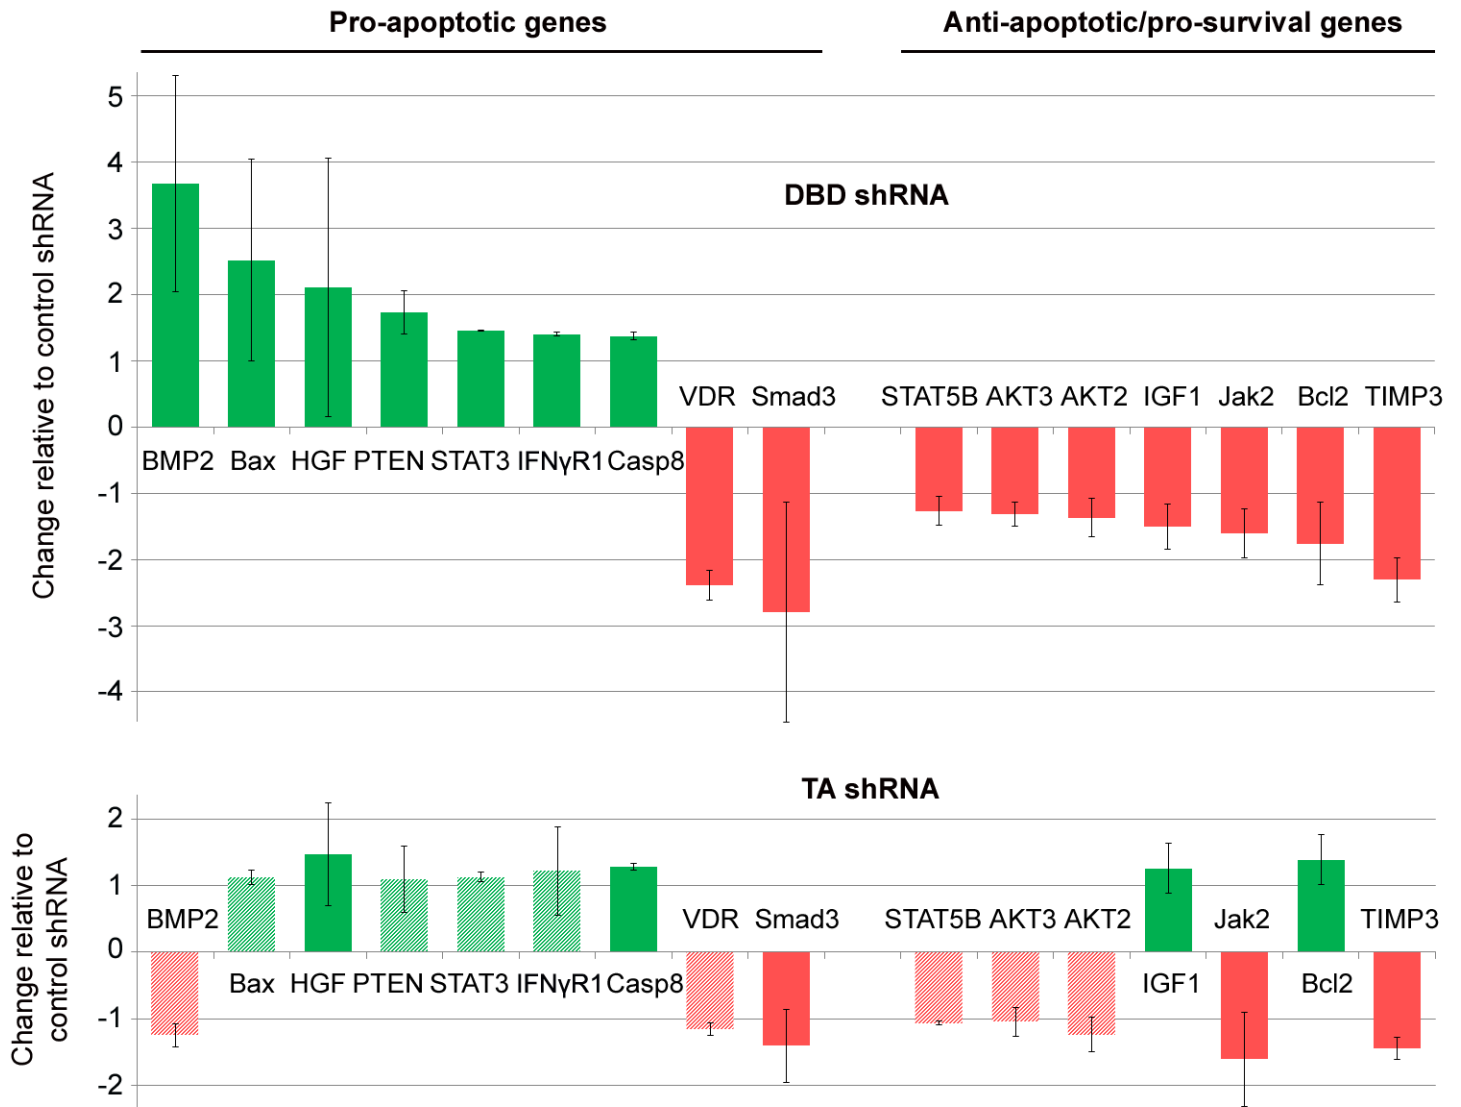

Supplementary Figure 4
